# Supplementary material for: Engineering of the structural and morphological characteristics of MWCNTs employing a nano-dimensional binary oxide coating with enhanced thermal oxidation resistance properties for the tailoring of their reinforcement potential
Source: Royal Society of Chemistry journal article supplement (doi:10.1039/d1nj05807j), 2022-01-01
Supplement: d1nj05807j1.pdf [file d1nj05807j1.pdf]

## Supporting Information

Ref: NJ-ART-12-2021-005807

### “Engineering of Structural and Morphological Characteristics of MWCNTs Employing Nano-dimensional Binary Oxide Coating with Enhanced Thermal Oxidation Resistance Property vis-a-vis Tailoring of its Reinforcement Potentiality”

Paromita Das <sup>a†</sup>, Savan Kumar Sharma<sup>a</sup>, and Barun K. Sanfui,<sup>\*a</sup>

<sup>a</sup>Department of Ceramic Technology, Government College of Engineering and Ceramic Technology (Autonomous Post Graduate) NAAC Accredited Grade A, 73, A. C. Banerjee Lane, Kolkata-700010, West Bengal, India,

\*E-Mail: [mailme.drbs@gmail.com](mailto:mailme.drbs@gmail.com)

<sup>†</sup> Refractory and Traditional Ceramics Division, CSIR-CG&CRI, Jadavpur, Kolkata-700032, West Bengal, India

**Table S1** Relative intensity position ( $2\theta$ ), FWHM and d-spacing (nm) analysis from XRD of pristine, functionalized CNTs and their respective coated counterparts.

| Code       | Graphitic region |      |                | Disordered region |      |                |
|------------|------------------|------|----------------|-------------------|------|----------------|
|            | $2\theta$        | FWHM | $d_{002}$ (nm) | $2\theta$         | FWHM | $d_{002}$ (nm) |
| P-CNT      | 25.94            | 2.15 | 0.3431         | 23.71             | 3.67 | 0.3749         |
| C2.5-P-CNT | ----             | ---- | ----           | ----              | ---- | ----           |
| F-CNT      | 25.92            | 1.88 | 0.3433         | 24.67             | 3.00 | 0.3604         |
| C2.5-F-CNT | 25.99            | 1.68 | 0.3424         | 24.54             | 1.94 | 0.3623         |

**Table S2** Relative intensity ratio (ID /IG), peak position and FWHM from Raman spectra of uncoated and variable MgAl-binary oxide coated F-CNT structure.

| First Order Raman Spectra | Peak 1 D band ( $\text{cm}^{-1}$ ) |       | Peak 2 G band ( $\text{cm}^{-1}$ ) |       | Peak 3 D' band ( $\text{cm}^{-1}$ ) |       | ID/IG |
|---------------------------|------------------------------------|-------|------------------------------------|-------|-------------------------------------|-------|-------|
|                           | Peak position                      | FWHM  | Peak position                      | FWHM  | Peak position                       | FWHM  |       |
| F-CNT                     | 1341.03                            | 53.41 | 1574.42                            | 42.83 | 1608.75                             | 24.81 | 1.057 |
| C2.5-F-CNT                | 1345.76                            | 45.38 | 1578.77                            | 40.60 | 1613.37                             | 20.13 | 1.147 |
| C5-F-CNT                  | 1350.34                            | 45.41 | 1584.83                            | 39.10 | 1621.99                             | 16.33 | 1.372 |
| C7.5-F-CNT                | 1351.21                            | 43.47 | 1586.55                            | 38.45 | 1623.35                             | 17.76 | 1.377 |
| C10-F-CNT                 | 1350.46                            | 43.12 | 1586.14                            | 38.64 | 1622.08                             | 18.37 | 1.376 |

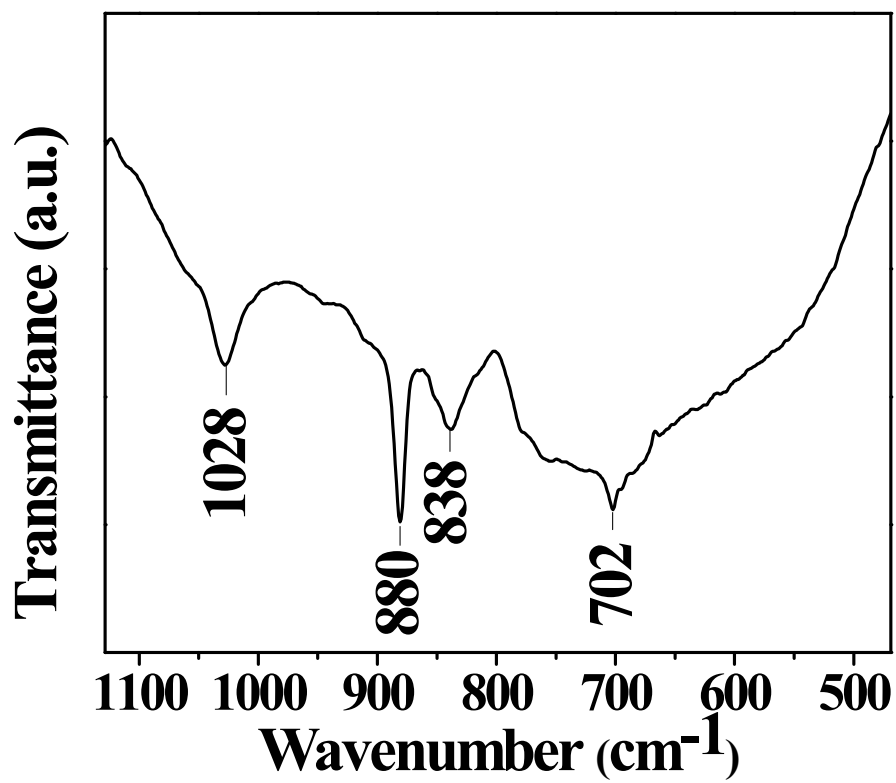

**Fig S1:** FTIR spectra of MgAl-binary oxide heat treated at 500°C for 2h.

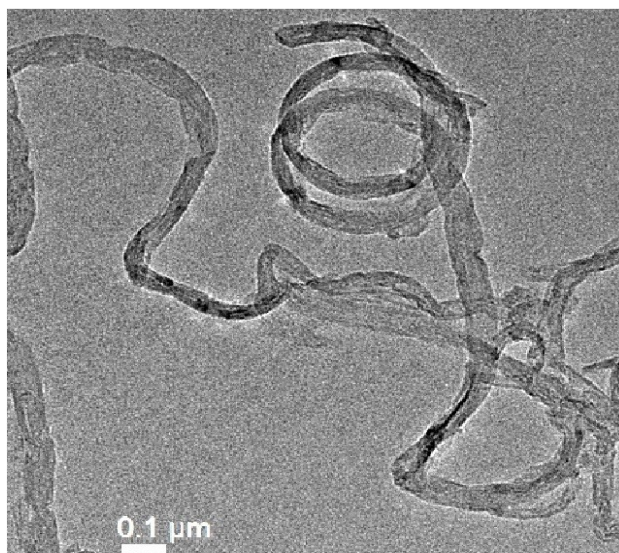

**Fig S2:** Low resolution TEM of MgAl-binary oxide coated MWCNTs nano-hybrid (C7.5-F-CNT) heat treated at 500°C for 2h.
